# Supplementary material for: Gender-Specific DNA Methylome Analysis of a Han Chinese Longevity Population
Source: Biomed Res Int. 2014 Apr 14;2014:396727. doi: 10.1155/2014/396727 (PMC4009103; doi:10.1155/2014/396727)
Supplement: Supplementary file 1 — Table S1. DMGs detected in autosomes. Here, the methylation status represented the DMG types. A hypermethylated DMG (annotated as ‘+') was defined if it only contains hypermethylated DMPs. Similarly, a hypomethylated gene (described as ‘-'), was defined if only hypomethylated DMPs were detected. If a gene contains both hypermethylated and hypomethylated DMPs, it was considered as a “mixed” DMG which was noted as ‘mixed'. Table S2. Overlaps between DMGs and known human aging genes. This table shows the list of DMGs which overlapped with known aging genes in both autosomal and X chromosomes. The status showed the type of DMGs. Table S3. Overlaps between autosomal DMGs and known disease genes. This table shows the overlaps between autosomal DMGs and known disease genes. Table S4. Overlaps between DMGs in X chromosome and known disease genes. This table shows the Overlaps between DMGs in X chromosome and known disease genes. [file 396727.f1.xlsx]

## Sheet: DMP_loc-0.2
DMGs detected in autosomes
UCSC_REFGENE_NAME	UCSC_REFGENE_ACCESSION	METHYLATION STATUS
DSG4	NM_177986	+
USP29	NM_020903	+
STT3A	NM_152713	+
PTPN23	NM_015466	+
NDUFS6	NM_004553	+
PTPRK	NM_002844	+
TNIK	NM_001161564	+
ZNF329	NM_024620	+
PHGR1	NM_001145643	+
MDGA1	NM_153487	+
WWC2	NM_024949	+
L3MBTL	NM_015478	+
SLC12A7	NM_006598	+
HMOX1	NM_002133	+
FLJ30679	NR_026674	+
HS3ST3A1	NM_006042	+
LOC284233	NR_026756	+
P4HA2	NM_001017974	+
RBM12	NM_152838	+
NSMCE4A	NM_017615	+
STK32C	NM_173575	+
SLC26A1	NM_022042	+
PTPRS	NM_130853	+
ANAPC4	NM_013367	+
NPHP4	NM_015102	+
GALNTL4	NM_198516	+
EXOC4	NM_001037126	+
DOCK9	NM_001130049	+
CPSF4L	NM_001129885	+
MYH14	NM_024729	+
DOCK2	NM_004946	+
AGPAT1	NM_032741	+
LEO1	NM_138792	+
NOSIP	NM_015953	+
NINL	NM_025176	+
ATP2C2	NM_014861	+
MFSD6	NM_017694	+
ACTL6B	NM_016188	+
SYN3	NM_001135774	+
C7orf50	NM_001134396	+
UNC119B	NM_001080533	+
LOC285780	NR_026970	+
AGAP11	NM_133447	+
ABCA10	NM_080282	+
KIAA1522	NM_020888	+
TLN2	NM_015059	+
CYP26C1	NM_183374	+
TCEB3CL	NM_001100817	+
LIMS2	NM_001161404	+
BASP1	NM_006317	+
PCGF3	NM_006315	+
LOC285768	NR_027115	+
RXRA	NM_002957	+
POU3F1	NM_002699	+
ACTR10	NM_018477	+
TIMP3	NM_000362	+
TMEM18	NM_152834	+
KCNS2	NM_020697	+
MAML2	NM_032427	+
SAMD12	NM_207506	+
IL12RB2	NM_001559	+
FTO	NM_001080432	+
FAM73A	NM_198549	+
STIM2	NM_001169118	+
PPP3CA	NM_001130692	+
PSORS1C1	NM_014068	+
GNAS	NM_016592	+
IQCE	NM_001100390	+
PYY	NM_004160	+
LAIR2	NM_021270	+
THSD7A	NM_015204	+
DNAH17	NM_173628	+
TCEB3C	NM_145653	+
UMODL1	NM_173568	+
THOC4	NM_005782	+
NCOR2	NM_001077261	+
UNC5C	NM_003728	+
C14orf28	NM_001017923	+
PION	NM_017439	+
ATP11A	NM_032189	+
ZNF451	NM_001031623	+
SRI	NM_198901	+
KIAA0391	NM_014672	+
SGPL1	NM_003901	+
SDK1	NM_152744	+
KIAA1530	NM_020894	+
PIF1	NM_025049	+
SKIV2L2	NM_015360	+
MAP3K13	NM_004721	+
PPAP2A	NM_003711	+
DBX2	NM_001004329	+
POU6F2	NM_001166018	+
QRICH2	NM_032134	+
INTS9	NM_001145159	+
MTHFSD	NM_001159379	+
HLA-DPB1	NM_002121	+
PAMR1	NM_015430	+
RAP1GAP	NM_002885	+
TMEM126A	NM_032273	+
PDE5A	NM_033437	+
KHDRBS3	NM_006558	+
ANKRD28	NM_015199	+
TSPO2	NM_001010873	+
CEP120	NM_001166226	+
SPTBN1	NM_003128	+
LY86	NM_004271	+
C10orf108	NR_027152	+
SLC20A2	NM_006749	+
SNRPA	NM_004596	+
SRGAP1	NM_020762	+
MYO5C	NM_018728	+
KIAA1826	NM_032424	+
USP32	NM_032582	+
NCAM1	NM_181351	+
LRRC7	NM_020794	+
TPO	NM_175722	+
WTIP	NM_001080436	+
ARSG	NM_014960	+
UNC84A	NM_001130965	+
IL22RA1	NM_021258	+
PILRA	NM_013439	+
CASZ1	NM_017766	+
NTF3	NM_002527	+
RGL2	NM_004761	+
PLD1	NM_002662	+
CDC6	NM_001254	+
TMEM131	NM_015348	+
CNTNAP2	NM_014141	+
TTC29	NM_031956	+
PKHD1	NM_170724	+
SUZ12	NM_015355	+
EPHA4	NM_004438	+
SLC45A4	NM_001080431	+
GNASAS	NR_002785	+
GLB1L	NM_024506	+
MYO10	NM_012334	+
SLC41A2	NM_032148	+
C1orf141	NM_001013674	+
GJB3	NM_024009	+
C19orf54	NM_198476	+
MGAT5B	NM_198955	+
MIR548N	NR_031666	+
PLXNB2	NM_012401	+
CLDN7	NM_001307	+
SLC17A2	NM_005835	+
NFYA	NM_002505	+
TNRC6C	NM_001142640	+
AHNAK	NM_024060	+
MRGPRE	NM_001039165	+
TMEM201	NM_001010866	+
SLC12A5	NM_001134771	+
CAPN5	NM_004055	+
BCAP29	NR_027830	+
IL23R	NM_144701	+
CADM1	NM_014333	+
ZFYVE16	NM_001105251	+
FAM22D	NM_001009610	+
ABCA9	NM_080283	+
TCERG1L	NM_174937	+
C6orf27	NM_025258	+
GABBR1	NM_001470	+
BFSP1	NM_001195	+
VCL	NM_014000	+
DUS4L	NM_181581	+
C20orf20	NM_018270	+
CYP19A1	NM_000103	+
TP53I13	NM_138349	+
CD96	NM_198196	+
SLC1A3	NM_004172	+
SEC11A	NM_014300	+
MIIP	NM_021933	+
RGS12	NM_002926	+
RLTPR	NM_001013838	+
NOXA1	NM_006647	+
KIAA1161	NM_020702	+
VANGL2	NM_020335	+
MIR1977	NR_031741	+
ANO1	NM_018043	+
SYPL1	NM_182715	+
DDX60L	NM_001012967	+
SMARCA5	NM_003601	+
CACNA1H	NM_001005407	+
KCND3	NM_004980	+
SYT15	NM_031912	+
WISP3	NM_003880	+
TANC2	NM_025185	+
SELP	NM_003005	+
LOC375190	NM_001145710	+
OMP	NM_006189	+
SLC39A11	NM_139177	+
ARFGEF1	NM_006421	+
DLGAP1	NM_004746	+
FAT1	NM_005245	+
CPNE1	NM_003915	+
DUOXA1	NM_144565	+
IDUA	NM_000203	+
RHOBTB3	NM_014899	+
SVOPL	NM_174959	+
MAP7	NM_003980	+
LOC729678	NR_027183	+
FAM35B2	NR_027634	+
ATG7	NM_006395	+
FOXP1	NM_032682	+
UCN3	NM_053049	+
LOC100128542	NM_001162367	+
FAM178B	NM_001122646	+
C15orf29	NM_024713	+
MAD1L1	NM_001013836	+
MIR548F3	NR_031644	+
MIR1266	NR_031670	+
KATNAL2	NM_031303	+
KALRN	NM_001024660	+
RNF149	NM_173647	+
LOC221442	NR_026938	+
CFDP1	NM_006324	+
NFKBID	NM_139239	+
PLEKHA7	NM_175058	+
PPP1R3C	NM_005398	+
ZNF561	NM_152289	+
MICALL2	NM_182924	+
TLR5	NM_003268	+
BTBD9	NM_052893	+
GTF2IRD1	NM_016328	+
SLC7A6OS	NM_032178	+
C1orf170	NR_027693	+
IL4I1	NM_172374	+
WIPF1	NM_001077269	+
IGF2R	NM_000876	+
UST	NM_005715	+
PRDM15	NM_001040424	+
SLC4A2	NM_003040	+
RFX4	NM_213594	+
DDR2	NM_001014796	+
CILP2	NM_153221	+
COL5A1	NM_000093	+
AGAP1	NM_001037131	+
LCTL	NM_207338	+
JPH4	NM_032452	+
DENND2A	NM_015689	+
CPT1A	NM_001031847	+
ZNF662	NM_001134656	+
EPHB3	NM_004443	+
TBCD	NM_005993	+
TMPRSS12	NM_182559	+
ERC2	NM_015576	+
TTC15	NM_016030	+
GLTPD1	NM_001029885	+
TTLL8	NM_001080447	+
ZNRF2	NM_147128	+
ADCY8	NM_001115	+
GNA12	NM_007353	+
ABCA5	NM_018672	+
CD300E	NM_181449	+
TTLL10	NM_001130045	+
UBD	NM_006398	+
CDKL2	NM_003948	+
SHANK3	NM_001080420	+
TESC	NM_001168325	+
PRKAG2	NM_016203	+
RFX8	NM_001145664	+
KIAA1841	NM_001129993	+
WWOX	NM_016373	+
LOC388387	NR_027254	+
S100A8	NM_002964	+
DPRX	NM_001012728	+
PTDSS2	NM_030783	+
NUP62	NM_153718	+
KRTAP13-1	NM_181599	+
RASA3	NM_007368	+
GUSBL1	NR_003504	+
TSPAN2	NM_005725	+
GPR39	NM_001508	+
ZBTB46	NM_025224	+
DPP10	NM_020868	+
AAK1	NM_014911	+
POLA2	NM_002689	+
PANK3	NM_024594	+
NEK3	NM_002498	+
ADARB2	NM_018702	+
PRMT7	NM_019023	+
CPNE7	NM_153636	+
TMEM41B	NR_028491	+
FILIP1	NM_015687	+
C22orf31	NM_015370	+
EPHB1	NM_004441	+
MMP12	NM_002426	+
LOC162632	NR_003190	+
SLIT1	NM_003061	+
NCLN	NM_020170	+
POU5F1B	NM_001159542	+
GPR123	NM_001083909	+
MAST3	NM_015016	+
C21orf70	NM_058190	+
SLC5A4	NM_014227	+
SLC6A3	NM_001044	+
GALNTL5	NR_033169	+
MDM4	NR_024171	+
BCL7C	NM_004765	+
CCDC9	NM_015603	+
HOPX	NM_032495	+
DUOX1	NM_017434	+
BIRC3	NM_001165	+
RNF213	NM_020914	+
SPATA24	NM_194296	+
FGFRL1	NM_021923	+
PTPRC	NM_080921	+
MIPEP	NM_005932	+
C11orf82	NM_145018	-
MST1R	NM_002447	-
WDR81	NM_001163811	-
PPT2	NM_138717	-
C2orf67	NM_152519	-
PRDM11	NM_020229	-
MOSC1	NM_022746	-
BRD9	NM_023924	-
MDFIC	NM_001166345	-
COL4A2	NM_001846	-
PRKAR2B	NM_002736	-
SRCAP	NM_006662	-
DNM3	NM_001136127	-
MITF	NM_006722	-
EGFL8	NM_030652	-
ATXN7L1	NM_138495	-
C20orf195	NM_024059	-
EPB41	NM_001166005	-
CHORDC1	NM_001144073	-
SYCP3	NM_153694	-
NXN	NM_022463	-
UGT2B17	NM_001077	-
KLC4	NM_201523	-
SSH2	NM_033389	-
SYNPO2	NM_001128933	-
NCKAP5	NM_207481	-
SYNGAP1	NM_006772	-
HIST1H2AA	NM_170745	-
SNORA22	NR_002961	-
PTPRN2	NM_130843	-
PTPN20B	NM_015605	-
LYN	NM_001111097	-
CROCC	NM_014675	-
GPR20	NM_005293	-
CTNNBIP1	NM_001012329	-
RAB19	NM_001008749	-
ZMYND15	NM_032265	-
COL1A1	NM_000088	-
ALOX5AP	NM_001629	-
MACROD1	NM_014067	-
DSCAM	NM_001389	-
GPR27	NM_018971	-
SBF2	NM_030962	-
CTDSPL2	NM_016396	-
SUPT4H1	NM_003168	-
EPC2	NM_015630	-
ANKRD6	NM_014942	-
TAP2	NM_018833	-
FMNL3	NM_175736	-
ITGB4	NM_000213	-
OSTalpha	NM_152672	-
ABR	NM_001159746	-
TFDP1	NM_007111	-
AXIN2	NM_004655	-
CLASP1	NM_001142274	-
PCDHA4	NM_018907	-
SNX9	NM_016224	-
MBNL1	NM_207294	-
HLA-E	NM_005516	-
PTPN20A	NM_001042393	-
RPL23AP53	NR_003572	-
PON1	NM_000446	-
SLCO2A1	NM_005630	-
ARNT	NM_001668	-
PI4KA	NM_058004	-
CLEC7A	NM_197954	-
UGT2B15	NM_001076	-
RNF17	NM_031277	-
SSH1	NM_018984	-
SKP2	NM_005983	-
PLCL2	NM_001144382	-
CCT2	NM_006431	-
CPLX1	NM_006651	-
SNTN	NM_001080537	-
TNXB	NM_019105	-
LMF1	NM_022773	-
LOC200726	NM_001102659	-
PDZRN3	NM_015009	-
CA10	NM_020178	-
TBL1XR1	NM_024665	-
KLF5	NM_001730	-
NR5A2	NM_003822	-
ZNF331	NM_018555	-
PDE4C	NM_000923	-
GNB2L1	NM_006098	-
LOC202181	NR_026921	-
COL21A1	NM_030820	-
RBM47	NM_001098634	-
SGK269	NM_024776	-
RAPGEF3	NM_001098531	-
FGF6	NM_020996	-
ZNF423	NM_015069	-
MAN2B1	NM_000528	-
CCT6P1	NR_003110	-
SNORA30	NR_002966	-
TNIP2	NM_001161527	-
UBN2	NM_173569	-
EXD3	NM_017820	-
COX10	NM_001303	-
SGMS2	NM_001136258	-
EHMT1	NM_001145527	-
RNPEP	NM_020216	-
SDHAP3	NR_003263	-
LDLRAD3	NM_174902	-
NAALADL2	NM_207015	-
HIST1H2BA	NM_170610	-
CACNB2	NM_001167945	-
CAB39	NM_001130850	-
PCDHA3	NM_018906	-
EIF4E3	NM_001134649	-
PCDHA2	NM_018905	-
VILL	NM_015873	-
INTS2	NM_020748	-
DGKD	NM_003648	-
KLHDC5	NM_020782	-
NOTCH4	NM_004557	-
SETD8	NM_020382	-
SORCS2	NM_020777	-
CLEC4C	NM_203503	-
GPR133	NM_198827	-
NIPA1	NM_144599	-
KIAA1614	NM_020950	-
ZFP64	NM_199427	-
ECE1	NM_001113349	-
ZC3HAV1	NM_024625	-
NKAPL	NM_001007531	-
FAM110A	NM_001042353	-
TAS2R8	NM_023918	-
PHF21B	NM_001135862	-
ZFPM2	NM_012082	-
AP2M1	NM_001025205	-
SHANK2	NM_133266	-
COL6A2	NM_058174	-
ACOXL	NM_001105516	-
PEX10	NM_153818	-
MUC2	NM_002457	-
SULF1	NM_001128206	-
AKAP13	NM_006738	-
UBE2E2	NM_152653	-
NSD1	NM_022455	-
NEDD4L	NM_001144969	-
NOG	NM_005450	-
PCDHA1	NM_018900	-
AGAP3	NM_031946	-
GPATCH8	NM_001002909	-
ARHGEF17	NM_014786	-
IGSF9B	NM_014987	-
JAK1	NM_002227	-
ZFPM1	NM_153813	-
VANGL1	NM_138959	-
LRP5L	NM_182492	-
ZNF827	NM_178835	-
RGS10	NM_001005339	-
PITRM1	NM_014889	-
SGSM2	NM_001098509	-
PRRT1	NM_030651	-
TMEFF1	NM_003692	-
AQP11	NM_173039	-
VAX1	NM_001112704	-
MUC21	NM_001010909	-
ANKRD11	NM_013275	-
REXO1	NM_020695	-
L3MBTL3	NM_032438	-
BCL7A	NM_020993	-
HOXA5	NM_019102	-
SH3BGR	NM_001001713	-
IRF8	NM_002163	-
2014-09-15	NM_004261	-
DDO	NM_003649	-
TBX1	NM_080646	-
LTC4S	NM_145867	-
ATP8B3	NM_138813	-
SPINK7	NM_032566	-
PRR15L	NM_024320	-
CHTF18	NM_022092	-
SGCE	NM_003919	-
ESR1	NM_001122741	-
SYT7	NM_004200	-
ZFPL1	NM_006782	-
SCAMP5	NM_138967	-
CLCN7	NM_001114331	-
SREBF1	NM_004176	-
CBX8	NM_020649	-
GPR68	NM_003485	-
C6orf47	NM_021184	-
TRIB1	NM_025195	-
ACTN1	NM_001130005	-
FAM170B	NM_001164484	-
PEG10	NM_001040152	-
ACSL5	NM_203380	-
PEX5L	NM_016559	-
SFRS8	NM_004592	-
WNT9B	NM_003396	-
GRAMD4	NM_015124	-
CDC42EP1	NM_152243	-
TTLL5	NM_015072	-
ITPR2	NM_002223	-
BCL11B	NM_138576	-
ZC3H12C	NM_033390	-
MED16	NM_005481	-
ZNF444	NM_018337	-
ABLIM2	NM_001130086	-
MYO1D	NM_015194	-
KAT2A	NM_021078	-
INHBB	NM_002193	-
CHIT1	NM_003465	-
CHKA	NM_001277	-
TMEM168	NM_022484	-
AP2A2	NM_012305	-
SUMO1P1	NR_002189	-
HEATR2	NM_017802	-
VPS37B	NM_024667	-
OCA2	NM_000275	-
SERPIND1	NM_000185	-
PPP4R4	NM_058237	-
HGS	NM_004712	-
APOM	NM_019101	-
HSPB9	NM_033194	-
CPZ	NM_001014448	-
CARKD	NM_018210	-
CNOT2	NM_014515	-
CAPZB	NM_004930	-
CDCA5	NM_080668	-
ESPNP	NR_026567	-
GALNT10	NM_198321	-
ROS1	NM_002944	-
FOXK1	NM_001037165	-
ZFAT	NM_020863	-
RBMS1	NM_016836	-
PCNT	NM_006031	-
DHRS9	NM_005771	-
TTC30A	NM_152275	-
PITPNM1	NM_004910	-
HECW1	NM_015052	-
TBC1D16	NM_019020	-
ZNF831	NM_178457	-
TMPRSS11A	NM_182606	-
USP40	NM_018218	-
IQGAP2	NM_006633	-
FAM83A	NM_207006	-
RPTOR	NM_020761	mixed
PRCP	NM_199418	mixed
CACNA1C	NM_001129842	mixed
HDAC4	NM_006037	mixed
DIP2C	NM_014974	mixed
MYLK	NM_053026	mixed
HCN2	NM_001194	mixed
HOXC4	NM_014620	mixed
NCRNA00171	NR_026751	mixed
RIPK1	NM_003804	mixed
ZDHHC14	NM_024630	mixed
AHRR	NM_020731	mixed
HOXC5	NR_003084	mixed
CUX1	NM_001913	mixed
HOXC6	NM_153693	mixed
INPP5A	NM_005539	mixed
RYBP	NM_012234	mixed
-: hypomethylated DMGs
+: hypermethylated DMGs
mixed: mixed DMGs
