# Supplementary material for: Gender-Specific DNA Methylome Analysis of a Han Chinese Longevity Population
Source: Biomed Res Int. 2014 Apr 14;2014:396727. doi: 10.1155/2014/396727 (PMC4009103; doi:10.1155/2014/396727)
Supplement: Supplementary file 3 [file 396727.f3.xlsx]

## Sheet: disease-automosal
Overlaps between automosal DMGs and known disease genes
UCSC_REFGENE_NAME	STATUS
bone	3
COL1A1	-
GNAS	+
CLCN7	-
cancer	5
ALOX5AP	-
PON1	-
ECE1	-
ZFPM2	-
PRKAG2	+
cardiovascular	5
ALOX5AP	-
PON1	-
ECE1	-
ZFPM2	-
PRKAG2	+
connective_tissue_disorder	3
COL1A1	-
TNXB	-
COL5A1	+
Dermatological	2
ITGB4	-
GJB3	+
developmental	2
CYP19A1	+
NSD1	-
ear_nose_throat	2
MYH14	+
GJB3	+
endocrine	4
SYCP3	-
GNAS	+
TPO	+
ESR1	-
Gastrointestinal	1
ECE1	-
Hematological	2
EPB41	-
SERPIND1	-
Immunological	4
TAP2	-
SELP	+
TLR5	+
PTPRC	+
Metabolic	6
HMOX1	+
MAN2B1	-
CYP19A1	+
IDUA	+
ESR1	-
CPT1A	+
Muscular	1
COL6A2	-
Neurological	4
PEX10	-
SGCE	-
ESR1	-
PTPRC	+
Nutritional	0
Ophthamological	1
TIMP3	+
Psychiatric	0
Renal	2
NPHP4	+
PKHD1	+
Respiratory	0
Skeletal	1
NOG	-
multiple	8
NDUFS6	+
CACNA1C	mixed
MITF	-
GNAS	+
PEX10	-
NSD1	-
NOG	-
SHANK3	+
Unclassified	1
HLA-DPB1	+
-: hypomethylated DMGs
+: hypermethylated DMGs
mixed: mixed DMGs
