# Supplementary material for: Gender-Specific DNA Methylome Analysis of a Han Chinese Longevity Population
Source: Biomed Res Int. 2014 Apr 14;2014:396727. doi: 10.1155/2014/396727 (PMC4009103; doi:10.1155/2014/396727)
Supplement: Supplementary file 4 [file 396727.f4.xlsx]

## Sheet: disease-sex-chromosome
Overlaps between DMGs in X chromosome and known disease genes
UCSC_REFGENE_NAME	STATUS
bone	0
cancer	1
DMD	-
cardiovascular	1
DMD	-
connective_tissue_disorder	0
Dermatological	1
EDA	-
developmental	0
ear_nose_throat	0
endocrine	2
BMP15	-
AR	-
Gastrointestinal	0
Hematological	1
BTK	-
Immunological	1
BTK	-
Metabolic	1
CLCN5	-
Muscular	2
DMD	-
AR	-
Neurological	2
FGD1	-
PAK3	-
Nutritional	0
Ophthamological	1
BCOR	-
Psychiatric	1
NLGN3	-
Renal	1
CLCN5	-
Respiratory	0
Skeletal	0
multiple	4
FGD1	-
GPC3	-
BCOR	-
KAL1	-
Unclassified	0
-: hypomethylated DMGs
+: hypermethylated DMGs
mixed: mixed DMGs
